# Supplementary material
Source: publisher site journal article supplement (https://www.dovepress.com/article/332613)
Supplement: Supplementary file 1 [file get_supplementary_file.php]

## **Supplementary Data and Tables**

### **Supplementary Data S1 - Randomization process**

The method consisted of the following steps: Initially a random allocation list of 20 sequential numbers was generated in 4 groups of 5 numbers through the specialized website <https://www.sealedenvelope.com/simple-randomiser/v1/lists> [Accessed 7 Dec 2015]. The four study groups were named Group 1 = Control, Group 2 = Bone Marrow, Group 3 = Adipose tissue and Group 4 = Co-infusion. An independent IEP-São Lucas (SP, Brazil) researcher made 20 cards numbered from 1 to 20 on carton board that was folded and placed in 20 identical envelopes. The envelopes were sent to the independent researcher at the Pulmonology Outpatient Clinic at ABC Medical School (FMABC - Santo André, SP, Brazil) who checked the 20 envelopes. The selected participants were summoned to choose 1 envelope and open it in the presence of the independent researcher and witnesses. The independent researcher from the Outpatient Clinic called the telephone number of the independent researcher of the IEP-São Lucas who informed the identification of the group corresponding to the number drawn by the participant. The independent researcher at the Pulmonary Outpatient Clinic at FMABC reported the outcome of the randomized group to the patient and to the study researchers who recorded it in the patient's chart.

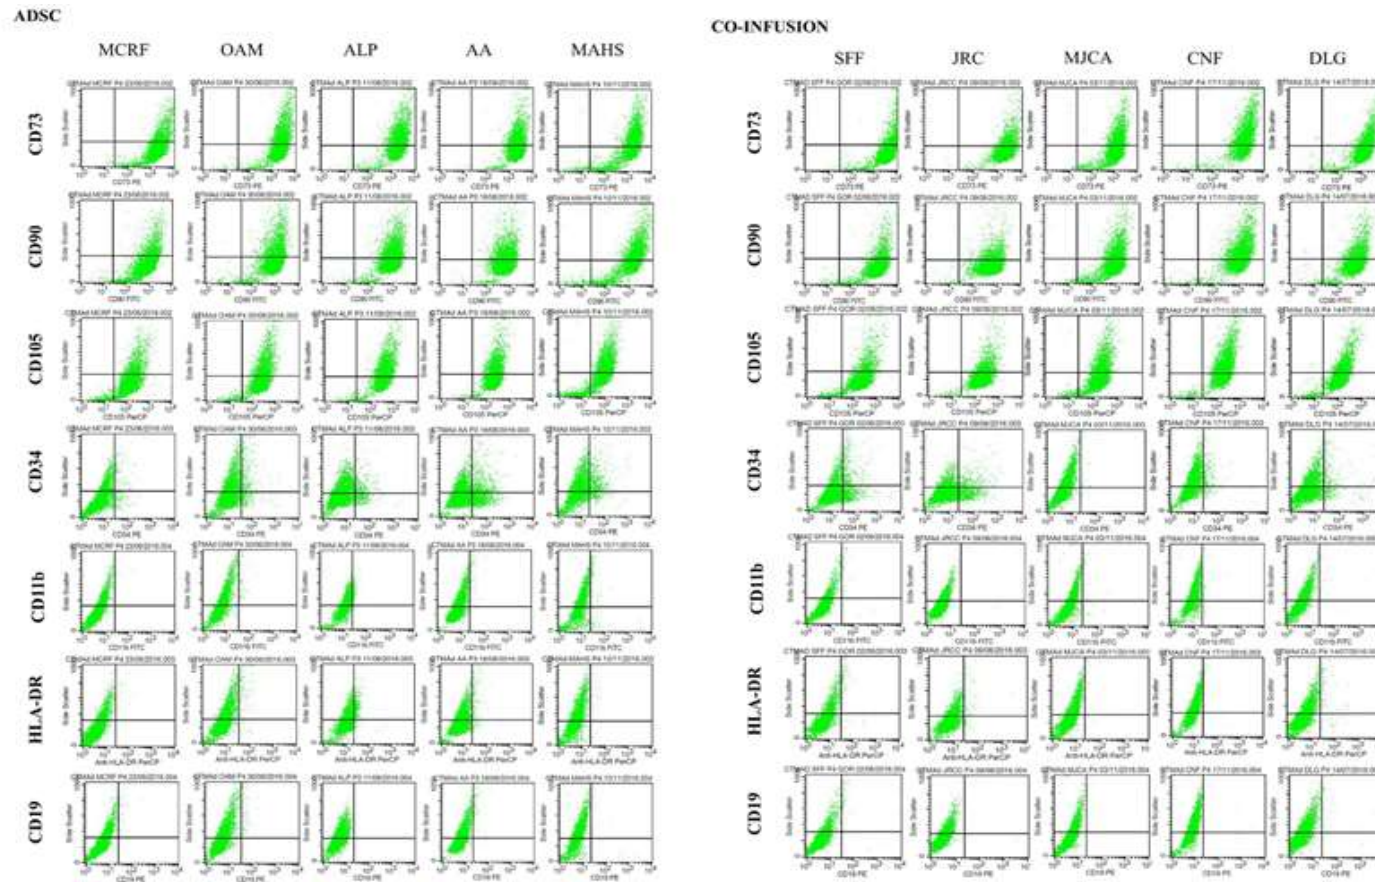

**Supplementary Figure 1. Gating strategy used to identify the cells on ADSC and Co-infusion groups.**

**Legend:** ADSC, adipose-derived mesenchymal stromal cells; subjects coded identifications, MCRF, OAM, ALP, AA, MAHS, SFF, JRC, MJCA, CNF, DLG; immunophenotypic markers (CD), CD73, CD90, CD105, CD34, CD11b, HLA-DR, CD19.

**Supplementary Table S1 Pre and post-treatment laboratory evaluation and clinical follow-up of patients**

| Evaluated<br>Parameters                                                         | Pre-<br>procedure | Procedure | Visits post-procedure |   |   |   |   |   |    |
|---------------------------------------------------------------------------------|-------------------|-----------|-----------------------|---|---|---|---|---|----|
|                                                                                 |                   |           | 7                     | 1 | 2 | 3 | 6 | 9 | 12 |
|                                                                                 |                   |           | D                     | M | M | M | M | M | M  |
| Clinical evaluation                                                             | X                 | X         | X                     | X | X | X | X | X | X  |
| mMRC Dyspnea Scale                                                              | X                 | X         | X                     | X | X | X | X | X | X  |
| 6 Minute Walk Test (6MWT)                                                       | X                 |           |                       | X |   | X | X | X | X  |
| Thorax radiography                                                              | X                 |           |                       | X |   |   |   | X |    |
| Chest computed tomography                                                       | X                 |           |                       |   |   | X |   |   | X  |
| Post-bronchodilator spirometry                                                  | X                 |           |                       |   |   | X | X |   | X  |
| Pulmonary volumes by<br>plethysmography                                         | X                 |           |                       |   |   | X | X |   | X  |
| CO diffusion                                                                    | X                 |           |                       |   |   |   | X |   | X  |
| Doppler cardiogram                                                              | X                 |           |                       |   |   |   |   |   | X  |
| Cardiopulmonary test                                                            | X                 |           |                       |   |   |   | X |   | X  |
| Ventilation/perfusion scintigraphy                                              | X                 |           |                       |   |   |   |   |   | X  |
| Urine I, coagulogram                                                            | X                 |           |                       |   |   |   |   |   |    |
| Anti-HIV, hepatitis B and C, syphilis                                           | X                 |           |                       |   |   |   |   |   |    |
| Arterial blood gas analysis                                                     | X                 |           |                       |   |   | X | X |   | X  |
| Complete blood count, renal function<br>sodium, potassium, urea, and creatinine | X                 |           |                       |   |   | X | X | X | X  |
| Inflammatory markers: CRP                                                       | X                 |           |                       |   |   | X | X | X | X  |
| Tumor marker CEA                                                                | X                 |           |                       |   |   | X |   | X | X  |
| Liver function: AST, ALT, GGT                                                   | X                 |           |                       |   |   |   |   |   | X  |

**Abbreviations:** D, days; M, months; mMRC, Modified Medical Research Council (Dyspnea scale; CO, carbon monoxide; HIV, human immunodeficiency virus; CRP, C-reactive protein; CEA, carcinoembryonic antigen; AST, aspartate aminotransferase; ALT, alanine aminotransferase; GGT, gamma-glutamyl transferase.

**Supplementary Table S2 Cell viability test and immunophenotypic markers (CD) for ADSC**

|             |          | Surface markers (CD) (%) |           |            |            |      |      |       |        |      |
|-------------|----------|--------------------------|-----------|------------|------------|------|------|-------|--------|------|
| Group       | Patient  | Viability (%)            | CD73/CD90 | CD73/CD105 | CD90/CD105 | CD34 | CD45 | CD11b | HLA-DR | CD19 |
| ADSC        | MCRF     | 96.38                    | 99.43     | 97.52      | 98.12      | 0.90 | 2.48 | 0.08  | 0.02   | 0.02 |
| ADSC        | OAM      | 97.56                    | 99.12     | 98.75      | 98.61      | 0.94 | 1.39 | 0.04  | 0.02   | 0.00 |
| ADSC        | ALP      | 93.82                    | 99.84     | 99.72      | 99.72      | 1.47 | 0.28 | 0.07  | 0.00   | 0.00 |
| ADSC        | AA       | 96.66                    | 99.90     | 99.88      | 99.84      | 1.26 | 0.16 | 0.00  | 0.12   | 0.02 |
| ADSC        | MAH<br>S | 98.26                    | 98.97     | 96.48      | 96.83      | 1.54 | 3.52 | 0.17  | 0.00   | 0.08 |
| Co-infusion | SFF      | 96.25                    | 99.34     | 97.79      | 98.13      | 0.91 | 2.21 | 0.08  | 0.02   | 0.04 |
| Co-infusion | JRC      | 95.58                    | 98.84     | 98.74      | 97.92      | 1.85 | 2.08 | 0.04  | 0.02   | 0.03 |
| Co-infusion | MJCA     | 98.26                    | 99.90     | 99.62      | 99.78      | 0.13 | 0.38 | 0.08  | 0.08   | 0.00 |
| Co-infusion | CNF      | 97.31                    | 99.20     | 98.11      | 98.11      | 1.43 | 1.89 | 0.09  | 0.06   | 0.02 |
| Co-infusion | DLG      | 92.08                    | 99.42     | 98.20      | 98.46      | 0.89 | 1.80 | 0.02  | 0.00   | 0.00 |
| Mean        |          | 96.22                    | 99.40     | 98.48      | 98.55      | 1.13 | 1.62 | 0.07  | 0.03   | 0.02 |
| SD          |          | 1.97                     | 0.38      | 1.08       | 0.97       | 0.48 | 1.08 | 0.05  | 0.04   | 0.03 |

**Abbreviations:** ADSC, adipose-derived stromal cells; CD, cluster of differentiation; SD, standard deviation.

**Supplementary Table S3 Cell viability test and immunophenotypic markers (CD) for bone marrow mononuclear cells - (BMMC)**

| <b>Group</b> | <b>Patients</b> | <b>Viability (%)</b> | <b>Mononuclear cells (MNC) %</b> | <b>CD45+CD34+</b> |
|--------------|-----------------|----------------------|----------------------------------|-------------------|
| BMMC         | MLO             | 98.75                | 53.53                            | 2.02              |
| BMMC         | AMIH            | 97.88                | 26.20                            | 1.33              |
| BMMC         | MCB             | 98.74                | 17.35                            | 0.43              |
| BMMC         | ELL             | 98.54                | 10.92                            | 0.51              |
| BMMC         | JSF             | 97.89                | 30.74                            | 1.73              |
| Co-infusion  | SFF             | 95.50                | 40.12                            | 1.15              |
| Co-infusion  | JRC             | 95.56                | 30.58                            | 0.90              |
| Co-infusion  | MJCA            | 96.73                | 48.87                            | 0.56              |
| Co-infusion  | CNF             | 98.10                | 28.66                            | 0.56              |
| Co-infusion  | DLG             | 97.95                | 46.96                            | 2.40              |
| Mean         |                 | 97.56                | 33.39                            | 1.16              |
| SD           |                 | 1.22                 | 13.85                            | 0.70              |

**Abbreviations:** BMMC, bone marrow mononuclear cells; SD, standard deviation.

**Supplementary Table S4 Spirometry FEV<sub>1</sub> (%) post-bronchodilator**

| Group       | Months |      |       |       |       |       |       |       |
|-------------|--------|------|-------|-------|-------|-------|-------|-------|
|             | 0      |      | 3     |       | 6     |       | 12    |       |
|             | μ      | SD   | μ     | SD    | μ     | SD    | M     | SD    |
| Control     | 41.80  | 7.95 | 48.33 | 12.86 | 44.00 | 13.66 | 43.60 | 12.62 |
| BMMC        | 39.60  | 6.99 | 39.80 | 8.81  | 38.00 | 8.37  | 43.75 | 12.61 |
| ADSC        | 38.76  | 5.74 | 43.60 | 19.11 | 34.60 | 8.62  | 34.60 | 8.32  |
| Co-infusion | 39.40  | 6.35 | 39.00 | 2.65  | 37.67 | 8.33  | 36.25 | 4.57  |

**Abbreviations:** FEV<sub>1</sub>, forced expiratory volume in the first second; BMMC, bone marrow mononuclear cell; ADSC, adipose-derived mesenchymal stromal cells; μ, mean; SD, standard deviation.

**Supplementary Table S5 Spirometry FEV<sub>1</sub>/FVC (%)**

| Group       | Months |       |       |       |       |       |       |       |
|-------------|--------|-------|-------|-------|-------|-------|-------|-------|
|             | 0      |       | 3     |       | 6     |       | 12    |       |
|             | μ      | SD    | μ     | SD    | μ     | SD    | M     | SD    |
| Control     | 66.20  | 13.48 | 51.33 | 11.02 | 47.75 | 7.72  | 49.60 | 7.44  |
| BMMC        | 64.56  | 10.83 | 46.00 | 12.21 | 51.46 | 11.00 | 56.25 | 22.65 |
| ADSC        | 63.56  | 15.09 | 48.40 | 9.86  | 45.40 | 6.99  | 46.60 | 8.56  |
| Co-infusion | 52.00  | 10.98 | 42.67 | 10.97 | 41.00 | 11.53 | 39.75 | 10.78 |

**Abbreviations:** FEV<sub>1</sub>, forced expiratory volume in the first second; FVC, forced vital capacity; BMMC, bone marrow mononuclear cell; ADSC, adipose-derived mesenchymal stromal cells; μ, mean; SD, standard deviation.

**Supplementary Table S6 Plethysmography TLC (%)**

| Group       | Months |       |        |       |        |       |        |       |
|-------------|--------|-------|--------|-------|--------|-------|--------|-------|
|             | 0      |       | 3      |       | 6      |       | 12     |       |
|             | $\mu$  | SD    | $\mu$  | SD    | $\mu$  | SD    | M      | SD    |
| Control     | 127.60 | 11.10 | 133.33 | 5.03  | 132.00 | 6.24  | 129.20 | 14.11 |
| BMMC        | 121.60 | 15.16 | 124.75 | 15.65 | 131.40 | 18.39 | 134.25 | 26.54 |
| ADSC        | 89.69  | 51.79 | 92.87  | 52.81 | 92.09  | 54.30 | 87.07  | 49.32 |
| Co-infusion | 142.50 | 21.98 | 145.00 | 2.65  | 134.00 | 21.52 | 140.50 | 16.58 |

**Abbreviations:** TLC, total lung capacity; BMMC, bone marrow mononuclear cell; ADSC, adipose-derived mesenchymal stromal cells;  $\mu$ , mean; SD, standard deviation.

**Supplementary Table S7 Plethysmography RV (%)**

| Group       | Months |       |        |       |        |       |        |       |
|-------------|--------|-------|--------|-------|--------|-------|--------|-------|
|             | 0      |       | 3      |       | 6      |       | 12     |       |
|             | $\mu$  | SD    | $\mu$  | SD    | $\mu$  | SD    | M      | SD    |
| Control     | 215.60 | 46.63 | 221.67 | 21.39 | 227.00 | 59.41 | 218.40 | 59.26 |
| BMMC        | 210.00 | 26.30 | 211.50 | 50.36 | 230.60 | 43.44 | 232.75 | 72.50 |
| ADSC        | 151.11 | 85.64 | 158.68 | 89.04 | 162.15 | 93.96 | 144.73 | 81.21 |
| Co-infusion | 233.00 | 49.30 | 224.00 | 74.36 | 239.67 | 44.24 | 230.75 | 63.76 |

**Abbreviations:** RV, residual volume; BMMC, bone marrow mononuclear cell; ADSC, adipose-derived mesenchymal stromal cells;  $\mu$ , mean; SD, standard deviation.

**Supplementary Table S8 Plethysmography RV/TLC (%)**

| Group       | Months |       |        |       |        |       |        |       |
|-------------|--------|-------|--------|-------|--------|-------|--------|-------|
|             | 0      |       | 3      |       | 6      |       | 12     |       |
|             | $\mu$  | SD    | $\mu$  | SD    | $\mu$  | SD    | M      | SD    |
| Control     | 195.80 | 33.80 | 198.00 | 13.86 | 188.67 | 52.97 | 192.00 | 34.39 |
| BMMC        | 186.60 | 23.32 | 195.75 | 31.44 | 195.60 | 25.15 | 198.75 | 36.45 |
| ADSC        | 156.83 | 91.69 | 159.05 | 92.34 | 163.46 | 92.28 | 154.48 | 88.89 |
| Co-infusion | 183.25 | 42.85 | 177.67 | 68.09 | 197.67 | 28.36 | 179.50 | 50.00 |

**Abbreviations:** RV, residual volume; TLC, total lung capacity; BMMC, bone marrow mononuclear cell; ADSC, adipose-derived mesenchymal stromal cells;  $\mu$ , mean; SD, standard deviation.

**Supplementary Table S9 Plethysmography DLCO (%)**

| Group       | Months |       |       |       |       |       |       |       |
|-------------|--------|-------|-------|-------|-------|-------|-------|-------|
|             | 0      |       | 3     |       | 6     |       | 12    |       |
|             | $\mu$  | SD    | $\mu$ | SD    | $\mu$ | SD    | M     | SD    |
| Control     | 47.60  | 26.99 | 54.00 | 22.61 | 56.25 | 23.92 | 48.80 | 22.08 |
| BMMC        | 35.92  | 26.92 | 60.25 | 24.10 | 61.25 | 27.84 | 64.00 | 20.52 |
| ADSC        | 43.40  | 30.71 | 52.40 | 21.00 | 54.20 | 23.64 | 48.00 | 19.89 |
| Co-infusion | 35.60  | 11.15 | 38.33 | 11.59 | 51.33 | 17.90 | 47.00 | 21.95 |

**Abbreviations:** DLCO - diffusion lung capacity for carbon monoxide; BMMC, bone marrow mononuclear cell; ADSC, adipose-derived mesenchymal stromal cells;  $\mu$ , mean; SD, standard deviation.



**Supplementary Table S10 Plethysmography Raw (%)**

| Group       | Months |       |        |       |        |        |        |       |
|-------------|--------|-------|--------|-------|--------|--------|--------|-------|
|             | 0      |       | 3      |       | 6      |        | 12     |       |
|             | M      | SD    | $\mu$  | SD    | $\mu$  | SD     | M      | SD    |
| Control     | 164.00 | 47.81 | 145.33 | 21.36 | 177.33 | 42.52  | 169.00 | 63.75 |
| BMMC        | 194.50 | 80.14 | 185.25 | 69.36 | 200.50 | 67.00  | 137.67 | 60.35 |
| ADSC        | 150.18 | 97.39 | 141.98 | 93.38 | 173.16 | 106.23 | 144.15 | 87.81 |
| Co-infusion | 151.00 | 0.45  | 158.33 | 26.16 | 174.67 | 19.50  | 185.00 | 25.31 |

**Abbreviations:** Raw, airway resistance; BMMC, bone marrow mononuclear cell; ADSC, adipose-derived mesenchymal stromal cells;  $\mu$ , mean; SD, standard deviation.

**Supplementary Table S11 Plethysmography pCO<sub>2</sub>**

| Group       | Months |      |       |      |       |      |       |      |
|-------------|--------|------|-------|------|-------|------|-------|------|
|             | 0      |      | 1     |      | 6     |      | 12    |      |
|             | M      | SD   | $\mu$ | SD   | $\mu$ | SD   | M     | SD   |
| Control     | 35.86  | 2.74 | 36.28 | 3.95 | 37.85 | 2.68 | 34.54 | 4.22 |
| BMMC        | 36.22  | 4.56 | 35.04 | 3.76 | 34.54 | 4.58 | 34.90 | 2.62 |
| ADSC        | 37.04  | 3.87 | 38.90 | 3.26 | 38.30 | 3.57 | 35.53 | 5.38 |
| Co-infusion | 37.10  | 3.94 | 36.83 | 3.18 | 38.35 | 2.90 | 37.23 | 5.25 |

**Abbreviations:** pCO<sub>2</sub>, partial pressure of CO<sub>2</sub>; BMMC, bone marrow mononuclear cell; ADSC, adipose-derived mesenchymal stromal cells;  $\mu$ , mean; SD, standard deviation.

**Supplementary Table S12 Scintigraphy of the right and left lungs of the control and treated patients, comparing the pre-treatment values and at the end of 12 months of follow-up**

| Treatment   | Right lung    |              |            | Left lung     |              |            |
|-------------|---------------|--------------|------------|---------------|--------------|------------|
|             | Pre-treatment | 12 months    | Difference | Pre-treatment | 12 months    | Difference |
| BMMC        | 50.73 ± 2.94  | 50.07 ± 1.32 | -0.66      | 49.27 ± 2.93  | 49.93 ± 1.31 | 0.66       |
| ADSC        | 54.59 ± 3.73  | 54.11 ± 2.81 | -0.48      | 45.41 ± 3.73  | 45.89 ± 2.81 | 0.48       |
| Co-infusion | 49.13 ± 0.98  | 49.51 ± 1.33 | 0.38       | 50.87 ± 0.98  | 50.49 ± 1.33 | -0.38      |
| Control     | 52.42 ± 4.17  | 53.40 ± 3.08 | 0.98       | 47.57 ± 4.17  | 46.59 ± 3.08 | -0.98      |

**Abbreviations:** BMMC, bone marrow mononuclear cell; ADSC, adipose-derived mesenchymal stromal cells.

**Supplementary Table S13 Analysis of results for different pulmonary function parameters over 12 months in relation to baseline data before treatment for the Control, BMMC, ADSC and Co-infusion groups**

|                                                        | $\Delta$ (%) |           |                                  |                                   |                         |                                  |
|--------------------------------------------------------|--------------|-----------|----------------------------------|-----------------------------------|-------------------------|----------------------------------|
|                                                        | Basal (L)    | Basal (%) | Basal - 3 months                 | 3 - 6 months                      | 6 - 12 months           | Basal - 12 months                |
| <b>Total lung capacity (TLC)</b>                       |              |           |                                  |                                   |                         |                                  |
| Control                                                | 617 ± 0.8    | 127 ± 11  | 0.16 (0.09; 0.39) <sup>a</sup>   | -0.18 (-0.18; -0.18) <sup>a</sup> | 0.17 (-0.15; 0.49)      | 0.4 (-0.17; 0.38)                |
| BMMC                                                   | 5.58 ± 1.5   | 121 ± 15  | 0 (-0.31; 0.46)                  | 0.055 (-0.05; 0.63)               | 0.33 (-0.80; 0.80)      | 0.22 (0; 1.89)                   |
| ADSC                                                   | 5.87 ± 1.3   | 118 ± 21  | 0 (-0.7; 0.63)                   | 0.079 (-0.7; 0.74)                | -0.49 (-0.67; 117.7)    | -0.34 (-0.55; 117.8)             |
| Co-infusion                                            | 7.89 ± 2.2   | 142 ± 21  | -0.54 (-0.62; 0.18) <sup>a</sup> | 0.015 (-0.38; 0.41)               | 0.32 (-0.18; 0.70)      | 0.29 (-0.31; 127.94)             |
| <b>Forced expiratory volume in first second (FEV1)</b> |              |           |                                  |                                   |                         |                                  |
| Control                                                | 1.1 ± 0.3    | 41 ± 7    | 0 (-0.03; 0.36)                  | 0.1 (-0.01; -0.01) <sup>a</sup>   | -0.2 (-0.08; 0.24)      | -0.09 (-0.29; 0.28)              |
| BMMC                                                   | 1.03 ± 0.4   | 39 ± 6    | 0.3 (-1.03; 0.07)                | 0.1 (-0.22; 1.05)                 | 0.07 (-0.06; 0.44)      | 0.9 (0.02; 0.22) <sup>a</sup>    |
| ADSC                                                   | 0.9 ± 0.1    | 38 ± 7    | -0.4 (-0.18; 0.09)               | 0.04 (-0.15; 0.06)                | -0.4 (-0.11; 0.22)      | -0.5 (-0.14; -0.01) <sup>a</sup> |
| Co-infusion                                            | 1.01 ± 0.1   | 39 ± 6    | -0.04 (-0.22; 0.04)              | 2.99 (-0.14; 0.14)                | -0.2 (-0.14; 0.01)      | -0.9 (-0.22; 0.01)               |
| <b>Residual volume (RV)</b>                            |              |           |                                  |                                   |                         |                                  |
| Control                                                | -            | 170 ± 104 | 6 (-11; 7)                       | -10 (-10; 10)                     | 16 (5; 27) <sup>a</sup> | 2 (-33; 40)                      |
| BMMC                                                   | -            | 204 ± 26  | 7.5 (-35; 48)                    | 12.5 (-12; 32)                    | 8 (-45; 46)             | 43 (-1; 97)                      |
| ADSC                                                   | -            | 201 ± 36  | 3 (-17; 25)                      | 22 (-39; 34)                      | -28 (-41; 19)           | -5 (-20; 10)                     |
| Co-infusion                                            | -            | 233 ± 49  | -40 (-41; 17)                    | -1 (-46; 44)                      | 9 (-21; 58)             | -5.5 (-27; 29)                   |
| <b>Residual volume/Total lung capacity (RV/TLC)</b>    |              |           |                                  |                                   |                         |                                  |
| Control                                                | -            | 195 ± 33  | 0 (-14; 144)                     | -3 (-3; 3)                        | 4.5 (4; 5) <sup>a</sup> | 6 (-10; 123)                     |
| BMMC                                                   | -            | 186 ± 23  | -2 (-28; 44)                     | -1 (-9; 24)                       | 4 (-3; 26)              | 6 (-7; 61)                       |
| ADSC                                                   | -            | 199 ± 31  | 3 (-1; 11)                       | 8 (-12; 158)                      | -13 (-158; 9)           | 1 (-12; 28)                      |
| Co-infusion                                            | -            | 183 ± 41  | -2 (-7; 6)                       | 0.5 (-6; 7)                       | 0 (-4; 6)               | -2 (-2; 6)                       |
| <b>Airway resistance (AR)</b>                          |              |           |                                  |                                   |                         |                                  |
| Control                                                | -            | 164 ± 47  | -8 (-76; 35)                     | 24 (24; 24)                       | -                       | 1 (-138.57; 99)                  |
| BMMC                                                   | -            | 194 ± 80  | -12 (-44; 31)                    | 8,5 (-2; 55)                      | -66 (-76; 92)           | -31 (-103; 86)                   |

|             |   |          |                         |              |               |                          |
|-------------|---|----------|-------------------------|--------------|---------------|--------------------------|
| ADSC        | - | 187 ± 51 | -2 (-30; 8)             | 46 (-28; 78) | -22 (-68; 93) | 20 (-88; 84)             |
| Co-infusion | - | 151 ± 23 | 12 (8; 14) <sup>a</sup> | 5 (-31; 41)  | 15 (-25; 41)  | 34 (22; 46) <sup>a</sup> |

#### Diffusion lung capacity for carbon monoxide (DLCO)

|             |   |         |                         |                        |              |                         |
|-------------|---|---------|-------------------------|------------------------|--------------|-------------------------|
| Control     | - | 47 ± 27 | 20 (5; 33) <sup>a</sup> | 4 (4; 4)               | -3 (-7; 0)   | -5 (-25; 31)            |
| BMMC        | - | 35 ± 26 | 15 (-1; 57)             | 3.5 (-14; 16)          | 1 (-15; 0)   | 17 (0; 43) <sup>a</sup> |
| ADSC        | - | 45 ± 29 | 8 (-10; 18)             | 3 (-4; 8)              | -10 (-11; 1) | 5 (-17; 15)             |
| Co-infusion | - | 35 ± 11 | -10 (-13; 16)           | 8 (1; 15) <sup>a</sup> | -1 (-12; 7)  | (-13; 57)               |

#### Alveolar volume (AV)

|             |            |           |                           |              |                        |                         |
|-------------|------------|-----------|---------------------------|--------------|------------------------|-------------------------|
| Control     | 3.8 ± 1.1  | 64 ± 32   | -8 (-11; -3)              | 7.5 (-2; 17) | -1 (-10; 20)           | -2 (-4; 3)              |
| BMMC        | 3.6 ± 1.2  | 67.2 ± 14 | 19 (9; 71.7) <sup>a</sup> | -3 (-10; 4)  | 4.5 (-5; 9)            | 8 (-16; 69.7)           |
| ADSC        | 3.4 ± 0.8  | 67.8 ± 12 | 13.5 (0; 31) <sup>a</sup> | -7 (-11; 2)  | 7 (1; 14) <sup>a</sup> | 25 (6; 27) <sup>a</sup> |
| Co-infusion | 4.62 ± 1.5 | 84.2 ± 20 | 5 (-1; 13)                | -4 (-5; 1)   | 0 (-7; 3)              | -1(-5;11)               |

#### Diffusion lung capacity for carbon monoxide/Alveolar volume (DLCO/AV)

|             |           |           |                         |              |                            |              |
|-------------|-----------|-----------|-------------------------|--------------|----------------------------|--------------|
| Control     | 3 ± 1     | 56.6 ± 23 | -7 (-11; 18)            | 6.5 (3; 10)  | -6.5 (-8; -5) <sup>a</sup> | -5 (-13; 6)  |
| BMMC        | 2.9 ± 1.3 | 57.7 ± 29 | 21 (4; 26) <sup>a</sup> | 3 (3; 3)     | -8 (-12; -1)               | -6 (-24; 21) |
| ADSC        | 3.1 ± 1.4 | 64.6 ± 31 | 11.5 (-1; 56)           | 3.5 (-4; 36) | -9 (-42; -2)               | 7 (-7; 43)   |
| Co-infusion | 2.1 ± 0.4 | 43 ± 8.8  | 17 (-10; 20)            | 5 (-6; 14)   | -9 (-16; 1)                | 12 (-14; 20) |

#### Inspiratory capacity (IC)

|             |   |         |                            |                          |                       |                        |
|-------------|---|---------|----------------------------|--------------------------|-----------------------|------------------------|
| Control     | - | 77 ± 10 | -15 (-15; -5) <sup>a</sup> | 4 (-1; 9)                | 4 (-3; 7)             | -5.5 (-28; 18)         |
| BMMC        | - | 77 ± 16 | 3 (-1; 12)                 | -2 (-2; -2) <sup>a</sup> | -2 (-2; 12)           | 0 (-6; 1)              |
| ADSC        | - | 71 ± 17 | 5.5 (1; 7) <sup>a</sup>    | 0 (-6; 2)                | 1 (0; 7) <sup>a</sup> | 8 (2; 15) <sup>a</sup> |
| Co-infusion | - | 80 ± 22 | -1 (-19; 0)                | -4 (-11; 5)              | 6 (-10; 17)           | -4 (-21; 6)            |

**Legend:** ADSC, adipose-derived mesenchymal stromal cells; BMMC, bone marrow mononuclear cells. The data are expressed as mean ± SEM. Statistical comparisons were performed using one-way ANOVA. <sup>a</sup>p < 0.05, vs. Basal.
